# Supplementary material for: Perampanel and pregnancy
Source: PubMed Central journal article supplement — Epilepsia. 2021 Mar 5;62(3):698–708. doi: 10.1111/epi.16821 (PMC7986165; doi:10.1111/epi.16821), 2021-03-05
Supplement: EPI-62-698-s001.pdf [file EPI-62-698-s001.pdf]

## **Supporting Information**

### **Perampanel and pregnancy**

Blanca Vazquez,<sup>1</sup> Torbjörn Tomson,<sup>2</sup> Cindy Dobrinsky,<sup>3</sup> Edgar Schuck,<sup>3</sup>

Terence J. O'Brien<sup>4,5</sup>

<sup>1</sup>NYU Langone Comprehensive Epilepsy Center, New York, NY, USA

<sup>2</sup>Department of Clinical Neuroscience, Karolinska Institutet, Stockholm, Sweden

<sup>3</sup>Eisai Inc., Woodcliff Lake, NJ, USA

<sup>4</sup>Department of Neuroscience, Central Clinical School, The Alfred Hospital,

Monash University, Melbourne, Australia

<sup>5</sup>Department of Medicine, The Royal Melbourne Hospital, The University of Melbourne,

Parkville, Australia

**FIGURE S1** Updated CYP3A4 ontogeny model used for pregnancy simulations.<sup>1</sup>

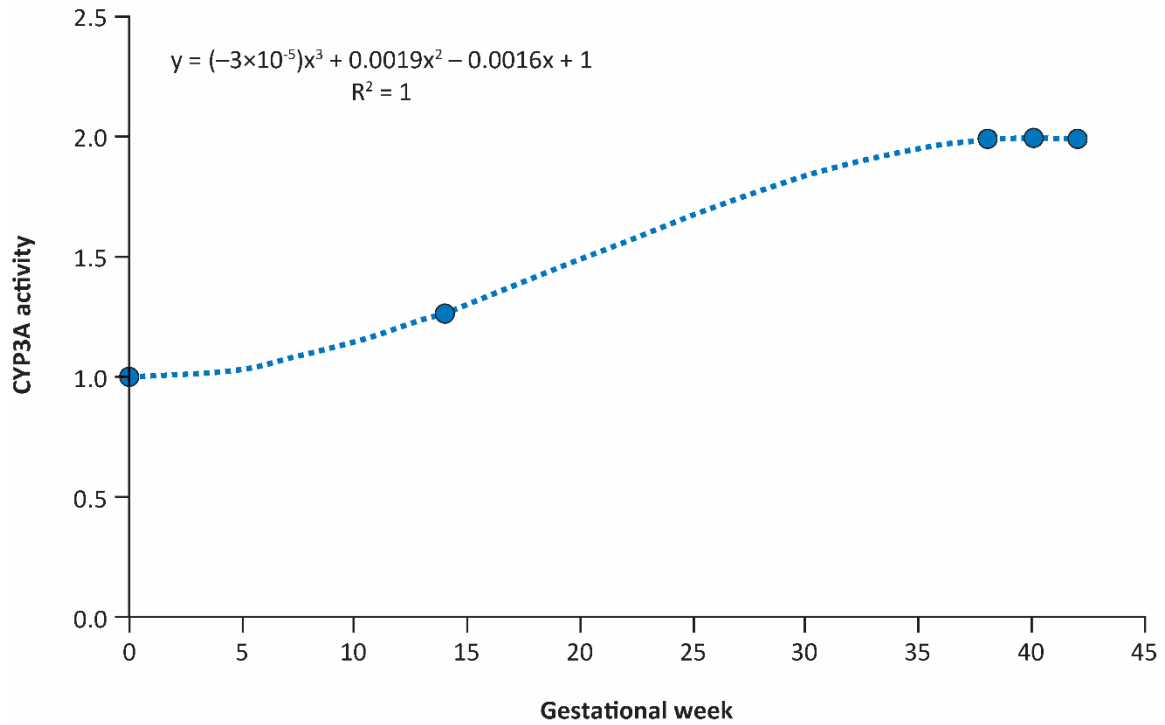

Abbreviation: CYP3A4, cytochrome P450 3A4.

1. Ke AB, Milad MA. Evaluation of Maternal Drug Exposure Following the Administration of Antenatal Corticosteroids During Late Pregnancy Using Physiologically-Based Pharmacokinetic Modeling. *Clin Pharmacol Ther* 2019;106:164-73.

**FIGURE S2** Single- and multiple-dose simulations of perampanel for model evaluation:

(A) single-dose simulation (8 mg); (B) multiple-dose simulation (6 mg once daily for 14 days).

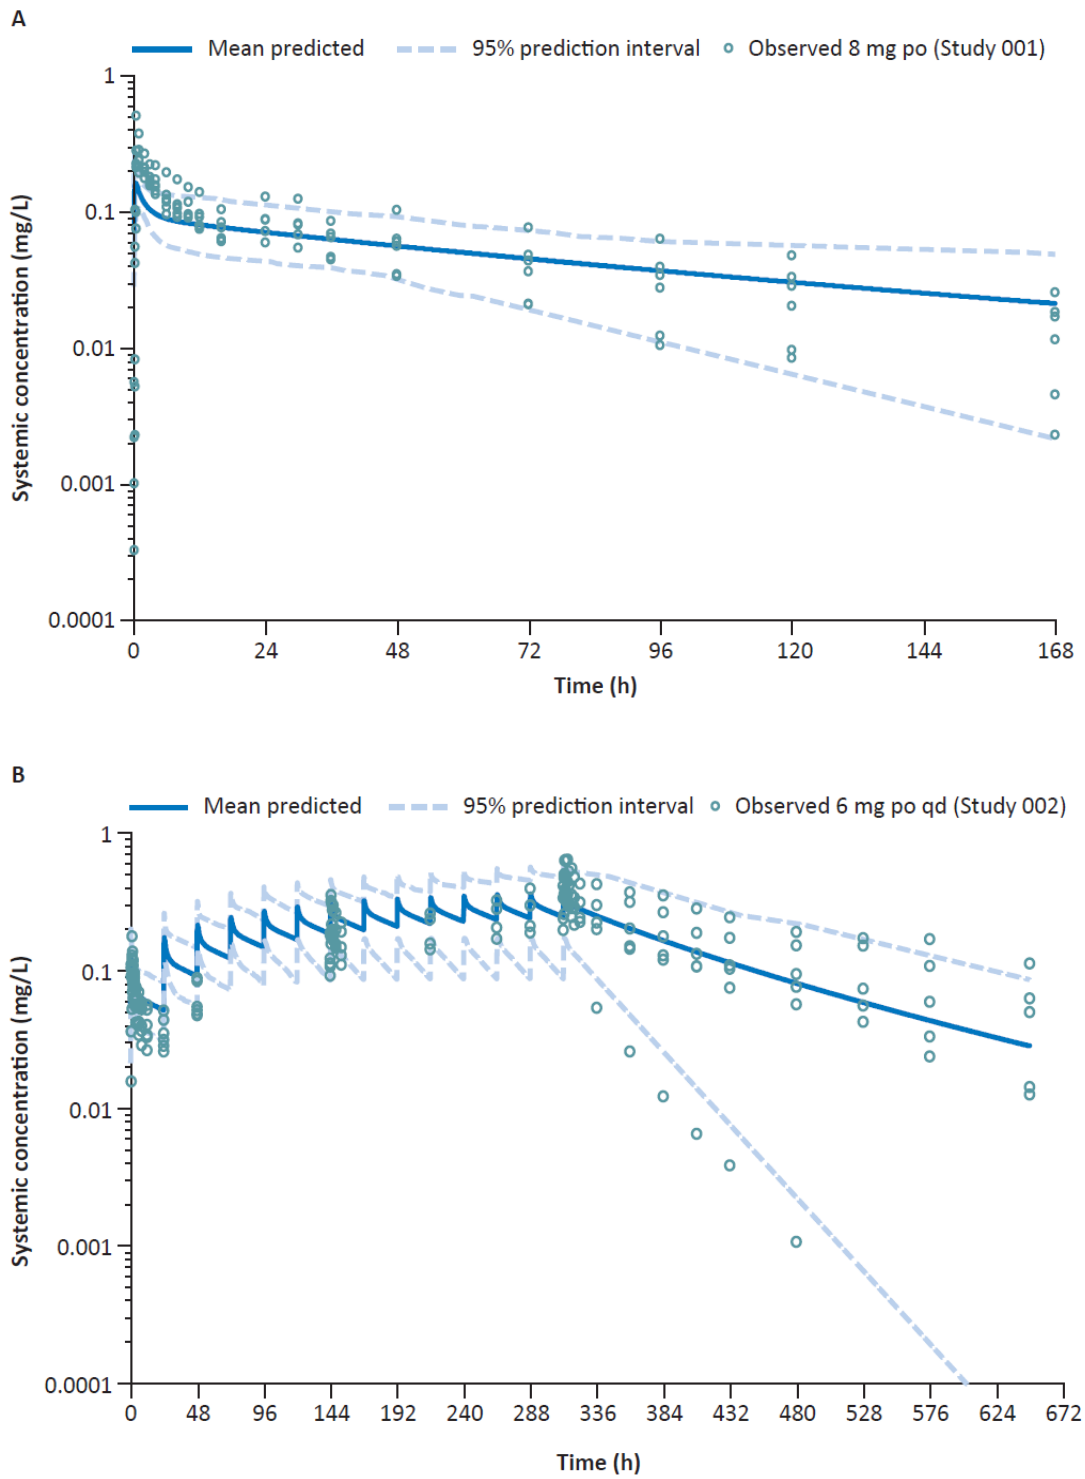

Abbreviations: po, orally; qd, once daily.
